# Supplementary material for: Exploring the Association Linking Head Position and Sleep Architecture to Motor Impairment in Parkinson’s Disease: An Exploratory Study
Source: MDPI journal article supplement (doi:10.3390/jpm13111591), 2023-11-10
Supplement: s1 [file s1]

**Supplementary Table S1.** Descriptive data of Figure 1.

| .       | Night 1: mean $\pm$ SD | Night 2: mean $\pm$ SD | p-value |
|---------|------------------------|------------------------|---------|
| %_S     | 36.7 $\pm$ 26.2        | 32.5 $\pm$ 24.1        | 0.51    |
| %_SW    | 12.8 $\pm$ 10.1        | 13.3 $\pm$ 9.7         | 0.70    |
| %_SW_S  | 33.2 $\pm$ 27.3        | 35.3 $\pm$ 26.7        | 0.86    |
| %_N3    | 14.3 $\pm$ 13.4        | 16.5 $\pm$ 15.9        | 0.71    |
| %_N3_S  | 1.9 $\pm$ 5.8          | 4.1 $\pm$ 7.6          | 0.18    |
| %_REM   | 8.6 $\pm$ 10.1         | 9.1 $\pm$ 6.3          | 0.36    |
| %_REM_S | 1.9 $\pm$ 5.2          | 1.7 $\pm$ 2.9          | 0.21    |

% of total recording time spent in supine position (%\_S); in slow wave (%\_SW); in slow wave and supine position (%\_SW\_S); in non-REM 3 (%\_N3); in non-REM 3 and supine position (%\_N3\_S); in REM (%\_REM); in REM and supine position (%\_REM\_S); for the 17 PD patients wearing the Sleep Profiler two or three consecutive nights.
